# Supplementary material
Source: PubMed Central journal article supplement (PMC2941313)
Supplement: 1004653107_pnas.201004653SI.pdf [file 1004653107_pnas.201004653SI.pdf]

# Supporting Information

Pelisch et al. 10.1073/pnas.1004653107

## SI Materials and Methods

**Plasmids.** The expression vectors used were: pcDNA3.1-HA-SUMO1 and pcDNA3.1-HA-SUMO3 (1, 2), pcDNA3.1-FLAG-HA-SENP1 (3, 4), pcDNA3-HA-PIAS1 and pcDNA3-FLAG-PIAS1 (5), GFP-SUMO and GFP-SUMO(GA) (6), Myc-Topo I and GST-Topors (7), HA-Sam68 (8).

**Immunofluorescence.** Fixed and permeabilized cells were blocked with 3% BSA in PBS. Afterward, cells were incubated with the primary antibody for 1 h in blocking buffer. After washing with PBS, cells were incubated with Alexa 637-conjugated secondary antibody for another hour. Cells were extensively washed with PBS and mounted.

**Immunoprecipitation.** For coimmunoprecipitation experiments, 30  $\mu$ L of anti-T7-agarose beads (Novagen) or 1  $\mu$ g of anti-HA (Covance) plus 30  $\mu$ L of Protein A/G Plus agarose (Santa Cruz Biotechnology) were used. After incubation for 1 h at 4 °C, beads were pelleted, and washed three times with lysis buffer and once with PBS. Immunoprecipitates were resuspended in 2 $\times$  Laemmli sample buffer.

**SUMO Transfer Reactions.** Recombinant E1 (150 ng), E2 (300 ng), and SUMO1 (small ubiquitin-related modifier-1) (200 ng) were incubated for 30 min at 30 °C in sumoylation assay buffer (9) supplemented with 0.5 mM ATP. Reactions were then diluted 3-fold in the same buffer but lacking ATP and containing EDTA (10 mM final concentration) to prevent further loading of the E2 by inhibiting the Mg<sup>2+</sup>-dependent activation by the E1. The SUMO-loaded E2 was then incubated with GST-p53 (200 ng) either with or without 200 ng GST-SF2/ASF for the indicated time points. Reactions were stopped by addition of an equal volume of 2 $\times$  Laemmli sample buffer.

**Western Blot and Antibodies.** The antibodies used were: anti-SF2/ASF (mAb 103 hybridome culture supernatant, provided by Adrián

Krainer, Cold Spring Harbor Laboratory, NY), anti-HA (Covance), anti-T7 (Bethyl Laboratories and Novagen), anti-T7 coupled to agarose beads (Novagen), anti-FLAG (Sigma), anti-Myc, anti- $\beta$ -actin, anti-p53, anti-GFP, and anti-Sam68 (Santa Cruz Biotechnology), anti-SUMO1 (Zymed/Invitrogen), anti-SUMO2/3 (IMGENEX), anti-Ubc9 (BD Biosciences), anti-Topo I (LAE Biotech), anti-GST (Abcam), anti-GAPDH (Abcam), and anti-Nop58 (Human Protein Atlas).

**SI ACKNOWLEDGMENTS.** The authors thank M. de la Mata and M. Blaustein for helpful discussions and suggestions; V. Buggiano and A. Turjanski for technical help; A. Kornblihtt for critical reading of the manuscript and support; R. Hay (Dundee, UK), D. Wotton (Charlottesville, NC), S. Weger (Berlin, Germany), J. Palvimo (Kuopio, Finland), C. Sette (Rome, Italy), J. Manley (New York, NY), F. Fuller-Pace (Dundee, UK), M. Dasso (Bethesda, MD), A. Mayeda (Aichi, Japan), R. Fisher (New York, NY), H. Ulrich (Herts, UK), A. Pichler (Vienna, Austria), F. Melchior (Heidelberg, Germany), P. O'Hare (London, UK), E. Wahle (Halle, Germany), F. Hirose (Hyogo, Japan), T.R. Reddy (Detroit, MI), C. Abate-Shen (New York, NY), H. Ariga (Sapporo, Japan), B. Chabot (Sherbrooke, Quebec, Canada), M. Carmo-Fonseca (Lisbon, Portugal), D. Fujita (Calgary, Canada), G. Biamonti (Pavia, Italy) and J. Cáceres (Edinburgh, UK) for providing plasmids, A. Krainer (New York, NY) for antibodies and C. Lima (New York, NY) for protocols. F.P., J.G., I.E.S., and M.J.M. are postdoctoral fellows from Consejo Nacional de Investigaciones Científicas y Técnicas of Argentina. J.D. and G.R. are doctoral fellows from Consejo Nacional de Investigaciones Científicas y Técnicas of Argentina. E.P. is a doctoral fellow of the University of Buenos Aires. B.J.W. is supported by an EU Marie-Curie International Incoming Fellowship. A.I.L. is a Wellcome Trust Principal Research Fellow; E.A. and A.S. are career investigators of Consejo Nacional de Investigaciones Científicas y Técnicas of Argentina. A.I.L. and A.S. are members of the European Alternative Splicing Network.

1. Desterro JM, et al. (1998) SUMO-1 modification of I $\kappa$ B $\alpha$  inhibits NF- $\kappa$ B activation. *Mol Cell* 2:233–239.
2. Tatham MH, et al. (2001) Polymeric chains of SUMO-2 and SUMO-3 are conjugated to protein substrates by SAE1/SAE2 and Ubc9. *J Biol Chem* 276:35368–35374.
3. Bailey D, O'Hare P (2002) Herpes simplex virus 1 ICP0 co-localizes with a SUMO-specific protease. *J Gen Virol* 83:2951–2964.
4. Bailey D, O'Hare P (2004) Characterization of the localization and proteolytic activity of the SUMO-specific protease, SENP1. *J Biol Chem* 279:692–703.
5. Lee H, et al. (2006) PIAS1 confers DNA-binding specificity on the Mx1 homeoprotein. *Genes Dev* 20:784–794.
6. Poukka H, et al. (2000) Covalent modification of the androgen receptor by small ubiquitin-like modifier 1 (SUMO-1). *Proc Natl Acad Sci USA* 97:14145–14150.
7. Hammer E, et al. (2007) The E3 ligase Topors induces the accumulation of polysumoylated forms of DNA topoisomerase I in vitro and in vivo. *FEBS Lett* 581:5418–5424.
8. Babic I, et al. (2006) SUMO modification of Sam68 enhances its ability to repress cyclin D1 expression and inhibits its ability to induce apoptosis. *Oncogene* 25:4955–4964.
9. Pichler A, Knipscheer P, Saitoh H, Sixma TK, Melchior F (2004) The RanBP2 SUMO E3 ligase is neither HECT- nor RING-type. *Nat Struct Mol Biol* 11:984–991.





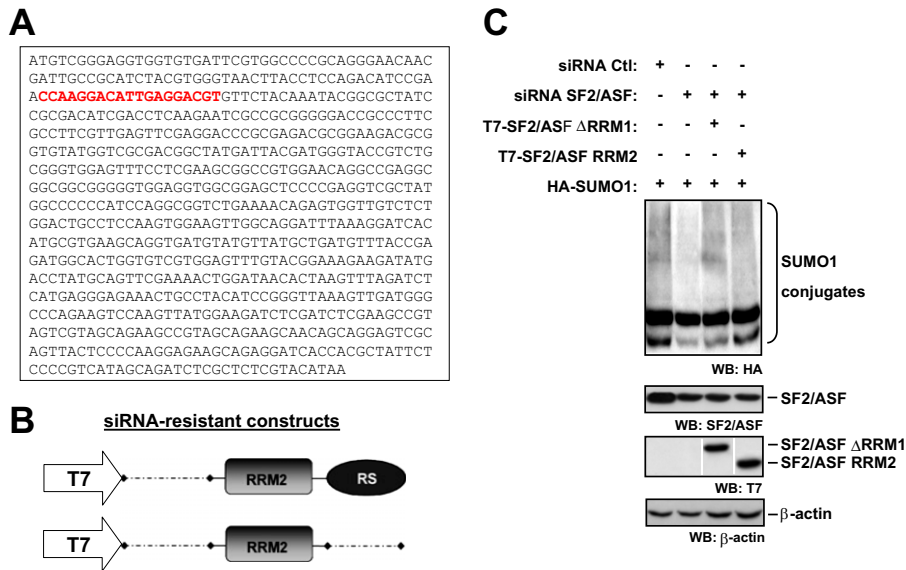

**Fig. 54.** (A) SF2/ASF cDNA showing (in red) the sequence targeted by the siRNA used to knock-down SF2/ASF expression. (B) SF2/ASF deletion constructs refractory to SF2/ASF siRNA because of the lack of the RRM1 domain and therefore the sequence targeted by the siRNA. (C) Cells were transfected with a control siRNA (siRNA Ctl) or with an SF2/ASF-specific siRNA (40 nM). After 24 h, cells were retransfected with HA-SUMO1 (500 ng) and either one of the siRNA-resistant constructs shown in B (300 ng). After 48 h from the second transfection, cells were lysed in Laemmli buffer and subject to Western blot analysis with the antibodies indicated at the bottom of each panel.

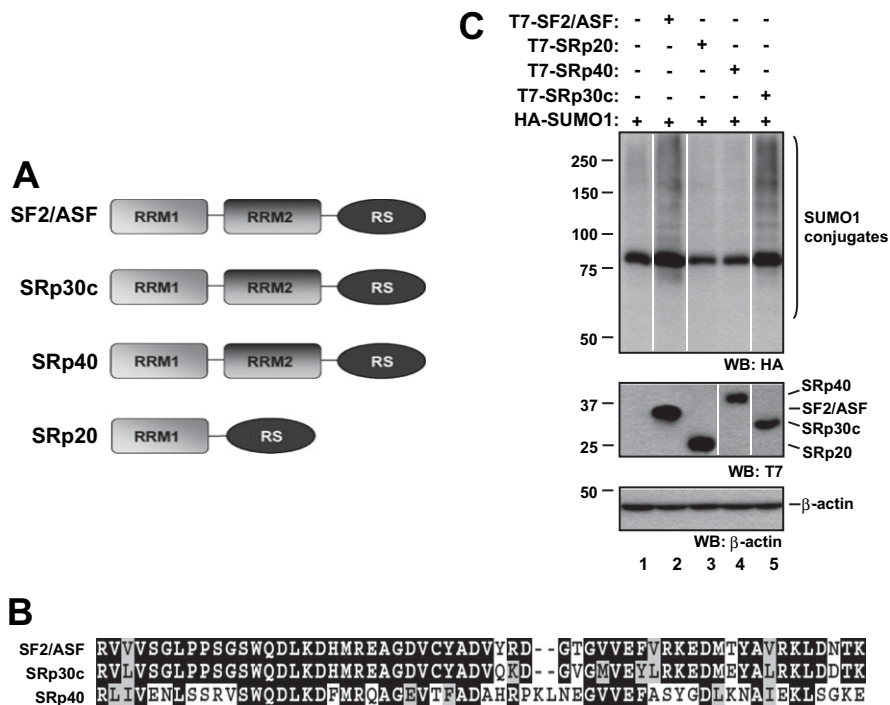

**Fig. 55.** (A) Scheme of SF2/ASF and other members of the Ser/Arg-rich (SR) family of proteins used to compare their sumoylation stimulatory activity. (B) Alignment of the RRM2 domains of SF2/ASF, SRp30c, and SRp40 according to ClustalW2 ([www.ebi.ac.uk/Tools/clustalw2/index.html](http://www.ebi.ac.uk/Tools/clustalw2/index.html)) and BOXSHADE 3.21 ([www.ch.embnet.org/software/BOX\\_form.html](http://www.ch.embnet.org/software/BOX_form.html)) software. Identical amino acids are shown in black and similar ones in gray. (C) HEK 293T cells were transfected with 500 ng HA-SUMO1 and 100 ng of T7-SF2/ASF, T7-SRp20, T7-SRp40, or T7-SRp30c. Cells were lysed 48 h posttransfection in Laemmli sample buffer; proteins were separated by SDS/PAGE and subject to Western blot as indicated at the bottom of each panel.





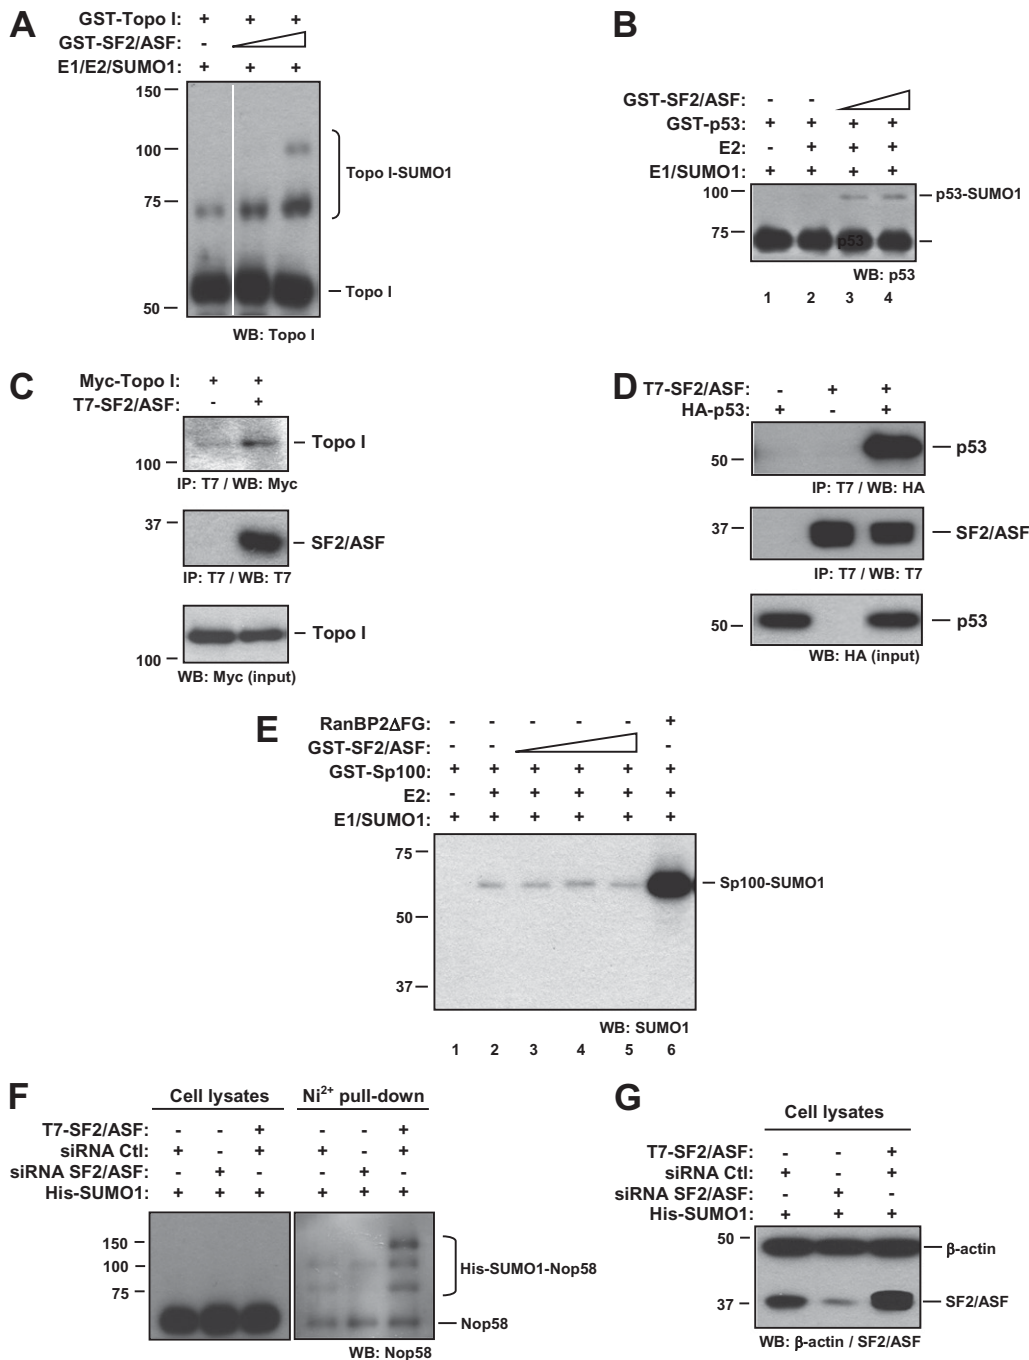

**Fig. S8.** (A) SF2/ASF stimulates SUMO 1 conjugation to Topo I in vitro. GST-Topoisomerase I ("Topo I," 1  $\mu$ g) was incubated with E1 (150 ng), E2 (30 ng), and SUMO1 (1  $\mu$ g), either with or without GST-SF2/ASF (150 ng or 300 ng) for 60 min in sumoylation assay buffer. Reactions were stopped by addition of an equal volume of 2 $\times$  Laemmli sample buffer, and analyzed by SDS/PAGE followed by Western blotting with an anti-Topo I antibody. (B) SF2/ASF stimulates SUMO 1 conjugation to p53 in vitro. GST-p53 (250 ng) was incubated with E1 (150 ng), E2 (30 ng), and SUMO1 (1  $\mu$ g), either with or without GST-SF2/ASF (100 ng or 200 ng) for 60 min in sumoylation assay buffer. Reactions were stopped by addition of an equal volume of 2 $\times$  Laemmli sample buffer, and analyzed by SDS/PAGE, followed by Western blotting with an anti-p53 antibody. (C) SF2/ASF interacts with Topo I in whole-cell lysates as assessed by coimmunoprecipitation. HEK 293T cells were transfected with Myc-Topo I and T7-SF2/ASF when indicated (500 ng each). Cells were lysed as described in *Material and Methods* and lysates were immunoprecipitated with anti-T7 agarose beads. After washing, precipitated proteins were resuspended in 2 $\times$  Laemmli sample buffer and subject to Western blot, as indicated at the bottom of each panel. (D) SF2/ASF interacts with p53 in whole-cell lysates as assessed by coimmunoprecipitation. HEK 293T cells were transfected with HA-p53 and T7-SF2/ASF as indicated, and coimmunoprecipitation assay was performed as in C. (E) SF2/ASF does not stimulate Sp100 sumoylation. A GST-Sp100 fragment encompassing amino acids 241 to 360 (Lys-297 is the physiological SUMO1 attachment site, 200 ng) was incubated with E1 (150 ng), E2 (30 ng), and SUMO1 (1  $\mu$ g), either with or without GST-SF2/ASF (200 ng, 500 ng, 1  $\mu$ g) or GST-RanBP2 $\Delta$ FG (10 ng) for 30 min in sumoylation assay buffer. Reactions were stopped by addition of an equal volume of 2 $\times$  Laemmli sample buffer, and analyzed by SDS/PAGE, followed by Western blotting with an anti-SUMO1 antibody. (F, G) SF2/ASF regulates SUMO 1 conjugation to Nop58 in living cells. HEK 293T cells were transfected with the indicated siRNAs and 24 h later with the indicated plasmids. After 48 h, cells were harvested and lysates were subject to Ni-NTA agarose purification under denaturing conditions. His-tagged sumoylated proteins were eluted in buffer containing 100 mM imidazole and 2% SDS, mixed with an equal volume of 2 $\times$  Laemmli sample buffer and subject to Western blot using Nop58 antibodies (F). A fraction of each cell lysate (3%) was run in parallel as input control. (G) Lysates were analyzed for SF2/ASF expression levels and  $\beta$ -actin as a control.

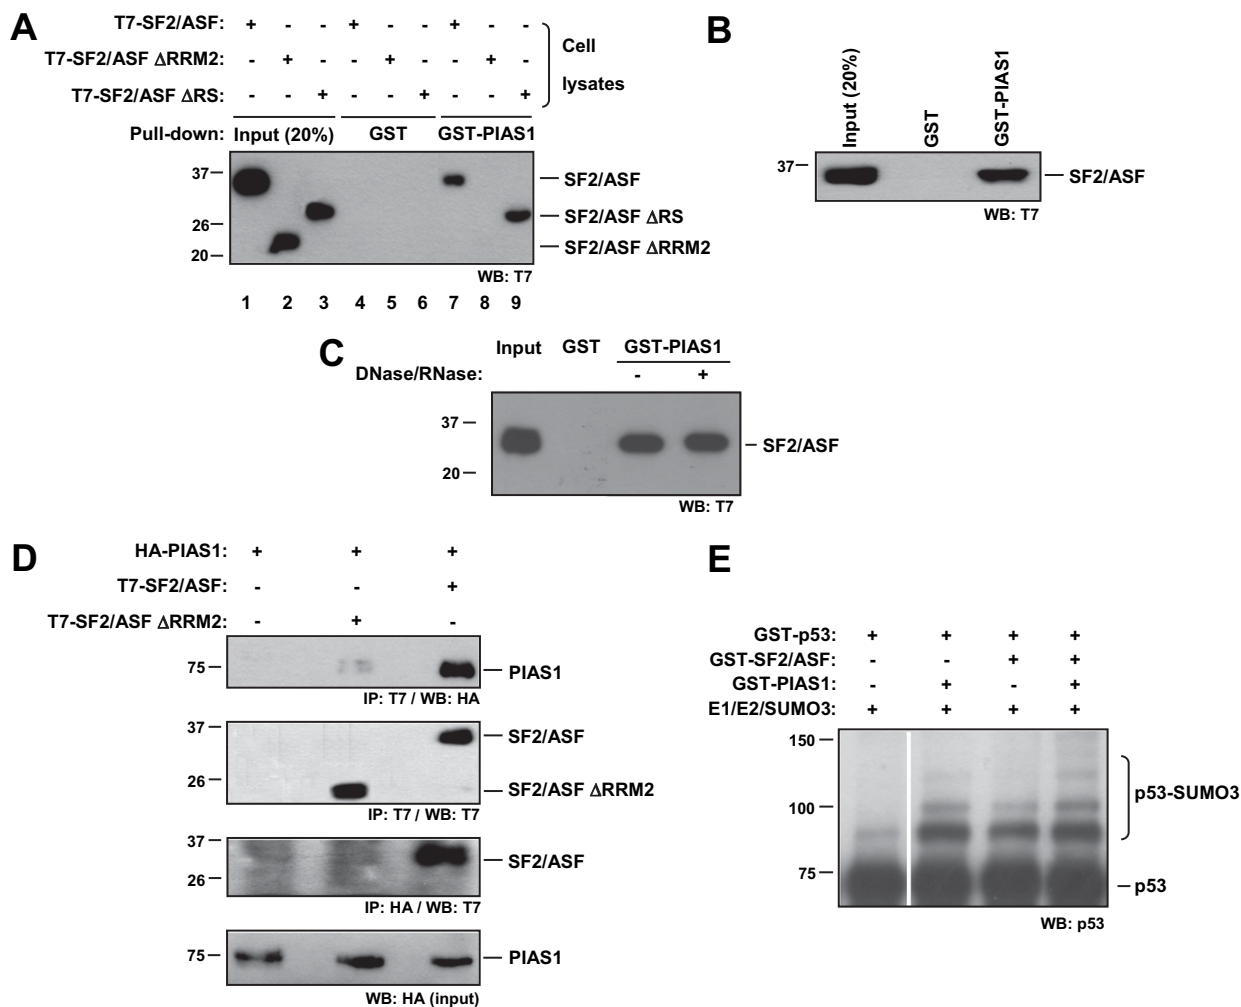

**Fig. S9.** (A) HEK 293T cells were transfected either with wild type T7-SF2/ASF  $\Delta$ RRM2, or  $\Delta$ RS, and lysates were prepared as described in *Materials and Methods*. Cleared lysates were incubated with 2  $\mu$ g GST or GST-PIAS1 and pulled-down with glutathione sepharose beads. SF2/ASF binding was analyzed by Western blotting with an anti-T7 antibody. (B) Purified recombinant T7-SF2/ASF (500 ng) was incubated with 2  $\mu$ g GST or GST-PIAS1 and pulled down with glutathione Sepharose beads. SF2/ASF binding was analyzed by Western blotting with an anti-T7 antibody. (C) Pull-down assay was performed essentially as in A. Before addition of the recombinant GST fusion protein, the lysate was divided in two aliquots: one of them was mock-treated and the other was treated with DNase and RNase. (D) SF2/ASF interacts with PIAS1 in whole-cell lysates as assessed by coimmunoprecipitation. HEK 293T cells were transfected with HA-PIAS1 alone or with either wild-type T7-SF2/ASF or its  $\Delta$ RRM2 mutant. Cells were lysed as described in *Materials and Methods* and lysates were immunoprecipitated with anti-T7 agarose beads or an anti-HA antibody together with protein A/G plus agarose beads. After washing, precipitated proteins were resuspended in Laemmli sample buffer and subject to Western blot, as indicated at the bottom of each panel. (E) GST-p53 (250 ng) was incubated with E1 (150 ng), E2 (30 ng), and SUMO3 (1  $\mu$ g), either with or without GST-SF2/ASF (400 ng) and GST-PIAS1 (100 ng) in sumoylation assay buffer for 30 min. Reactions were stopped by addition of one volume of Laemmli sample buffer and analyzed by Western blotting with an anti-p53 antibody.
